# Supplementary material for: Elevated neoantigen levels in tumors with somatic mutations in the HLA-A, HLA-B, HLA-C and B2M genes
Source: PubMed Central journal article supplement (PMC6657029; doi:10.1186/s12920-019-0544-1), 2019-07-25
Supplement: 12920_2019_544_MOESM2_ESM.pdf [file 12920_2019_544_MOESM2_ESM.pdf]

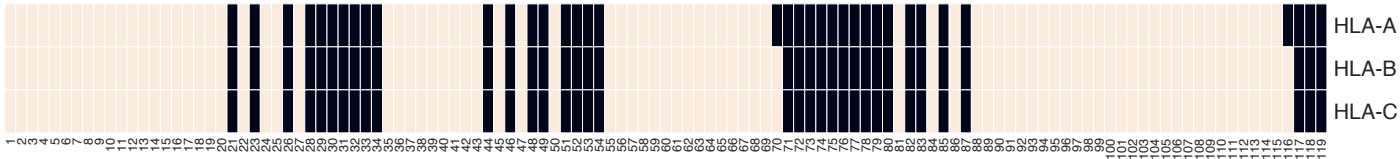

B2M residues
